# Supplementary material for: Copepod community growth rates in relation to body size, temperature, and food availability in the East China Sea: a test of metabolic theory of ecology
Source: Copernicus journal article supplement (doi:10.5194/bg-10-1877-2013), 2013-03-20
Supplement: Supplementary file 1 [file bg-10-1877-2013-supplement.pdf]

## Supplement A – Non-phytoplankton food sources for copepods

Table A1. List of observed non-phytoplankton food sources for copepods.

| Taxa of copepods                                                                                                               | Food sources                                                     | References                                 |
|--------------------------------------------------------------------------------------------------------------------------------|------------------------------------------------------------------|--------------------------------------------|
| Adults of small species<br>( <i>Acartia</i> , <i>Oithona</i> ,<br><i>Paracalanus</i> ), arctic<br><i>Calanus</i> spp., nauplii | Heterogeneous protozooplankton                                   | Turner, 2004 and references therein        |
| Oithonidae                                                                                                                     | Nauplii, protozooplankton                                        | Turner, 2004                               |
| <i>Oithona davisae</i>                                                                                                         | Flagellates                                                      | Uye, 1994                                  |
| <i>Oithona similis</i>                                                                                                         | Pellets of zooplankton                                           | González and Smetacek, 1994                |
| <i>Limnoithona tetraspina</i>                                                                                                  | Microzooplankton                                                 | Gould and Kimmerer, 2010                   |
| <i>Corycaeus</i> spp.                                                                                                          | Nauplii                                                          | Turner et al., 1984; Landry et al., 1985   |
| Oncaeidae                                                                                                                      | Flagellates                                                      | Turner, 2004                               |
| <i>Oncaea mediterranea</i>                                                                                                     | Marine snow                                                      | Alldredge, 1972; Ohtsuka and Kubo, 1991    |
| <i>Pseudocalanus acuspes</i>                                                                                                   | Ciliates, flagellates, heterogenous particles, sinking particles | Peters et al., 2006; Renz and Hirche, 2006 |
| <i>Calanus pacificus</i>                                                                                                       | Bacteria                                                         | Lawrence et al., 1993                      |
| Various taxa                                                                                                                   | Bacteria, ciliates, dinoflagellates, cannibalism                 | Mauchline, 1998 and references therein     |

## References

- Alldredge, A. L.: Abandoned larvacean houses: a unique food source in the pelagic environment, *Science*, 177, 885-887, 1972.
- González, H. and Smetacek, V.: The possible role of the cyclopoid copepod *Oithona* in retarding vertical flux of zooplankton fecal material, *Mar. Ecol. Prog. Ser.*, 113, 233-246, 1994.
- Gould, A. L. and Kimmerer, W. J.: Development, growth, and reproduction of the cyclopoid copepod *Limnoithona tetraspina* in the upper San Francisco Estuary, *Mar. Ecol. Prog. Ser.*, 412, 163-177, 2010.
- Landry, M. R.: Predatory feeding behavior of the marine cyclopoid copepod *Corycaeus anglicus*, *Mar. Biol.*, 85, 163-169, 1985.
- Lawrence, S. G., Ahmad, A., and Azam, F.: Fate of particle-bound bacteria ingested by *Calanus pacificus*, *Mar. Ecol. Prog. Ser.*, 97, 299-307, 1993.

- Mauchline, J., Blaxter, J. H. S., Southward, A. J., and Tyler, P. A. (Eds.): The Biology of Calanoid Copepods, Elsevier Academic Press, 710 pp., 1998.
- Ohtsuka, S. and Kubo, N.: Larvaceans and their houses as important food for some pelagic copepods, Proceedings of the fourth International Conference on Copepods; Bull. Plankton Soc. Japan, Spec. Vol. (1991), 535-551, 1991.
- Peters, J., Renz, J., van Beusekom, J., Boersma, M., and Hagen, W.: Trophodynamics and seasonal cycle of the copepod *Pseudocalanus acuspes* in the Central Baltic Sea (Bornholm Basin): evidence from lipid composition, Mar. Biol., 149, 1417-1429, 2006.
- Renz, J. and Hirche, J.: Life cycle of *Pseudocalanus acuspes* Giesbrecht (Copepoda, Calanoida) in the Central Baltic Sea: I. Seasonal and spatial distribution, Mar. Biol., 138, 567-580, 2006.
- Turner, J. T., Tester, P. A., and Conley, W. J.: Zooplankton feeding ecology: predation by the marine cyclopoid copepod *Corycaeus amazonicus* F. Dahl upon natural prey, J. Exp. Mar. Biol. Ecol., 84, 191-202, 1984.
- Turner, J. T.: The importance of small planktonic copepods and their roles in pelagic marine food webs, Zool. Stud., 43, 255-266, 2004.
- Uye, S. I.: Replacement of large copepods by small ones with eutrophication of embayments: cause and consequence, Hydrobiologia, 292/293, 513-519, 1994.

## Supplement B – Information of experimental sites

Table B1. Sampling date and corresponding season and spatial group (4 groups determined from *K*-means clustering according to surface salinity and chlorophyll *a* concentration) of each cruise-station. We use “Sequence” to denote different samples because some stations were sampled more than one time.

| Cruise-stations | Sequence | Dates         | Season | Group |
|-----------------|----------|---------------|--------|-------|
| 897_E7          | 1        | May 2009      | Spring | A     |
| 897_26          | 2        | May 2009      | Spring | A     |
| 905_16          | 3        | July 2009     | Summer | A     |
| 905_26          | 4        | July 2009     | Summer | A     |
| 905_29          | 5        | July 2009     | Summer | B     |
| 905_30          | 6        | July 2009     | Summer | B     |
| 924_30          | 7        | April 2010    | Spring | C     |
| 925_w6          | 8        | May 2010      | Spring | A     |
| 925_w12         | 9        | May 2010      | Spring | A     |
| 925_w16         | 10       | May 2010      | Spring | A     |
| 932_29          | 11       | July 2010     | Summer | D     |
| 932_30          | 12       | July 2010     | Summer | D     |
| 966_E6          | 13       | July 2011     | Summer | B     |
| 966_E9          | 14       | July 2011     | Summer | A     |
| 966_20          | 15       | July 2011     | Summer | C     |
| 980_9           | 16       | November 2011 | Winter | A     |
| 980_19A         | 17       | November 2011 | Winter | A     |
| 1615_9          | 18       | March 2009    | Spring | A     |
| 1632_5          | 19       | May 2009      | Spring | B     |
| 1632_9          | 20       | May 2009      | Spring | A     |
| 1632_13         | 21       | May 2009      | Spring | A     |
| 1719_1          | 22       | May 2010      | Spring | C     |
| 1719_5          | 23       | May 2010      | Spring | B     |
| 1719_9          | 24       | May 2010      | Spring | A     |
| 1719_11         | 25       | May 2010      | Spring | A     |
| 1735_9          | 26       | July 2010     | Summer | A     |
| 1753_9          | 27       | October 2010  | Winter | A     |
| 1766_9          | 28       | December 2010 | Winter | A     |
| 1813_1          | 29       | August 2011   | Summer | B     |
| 1813_5          | 30       | August 2011   | Summer | A     |
| 1813_9          | 31       | August 2011   | Summer | A     |

**Supplement C – Schematic diagram of artificial cohort incubation experiments.**

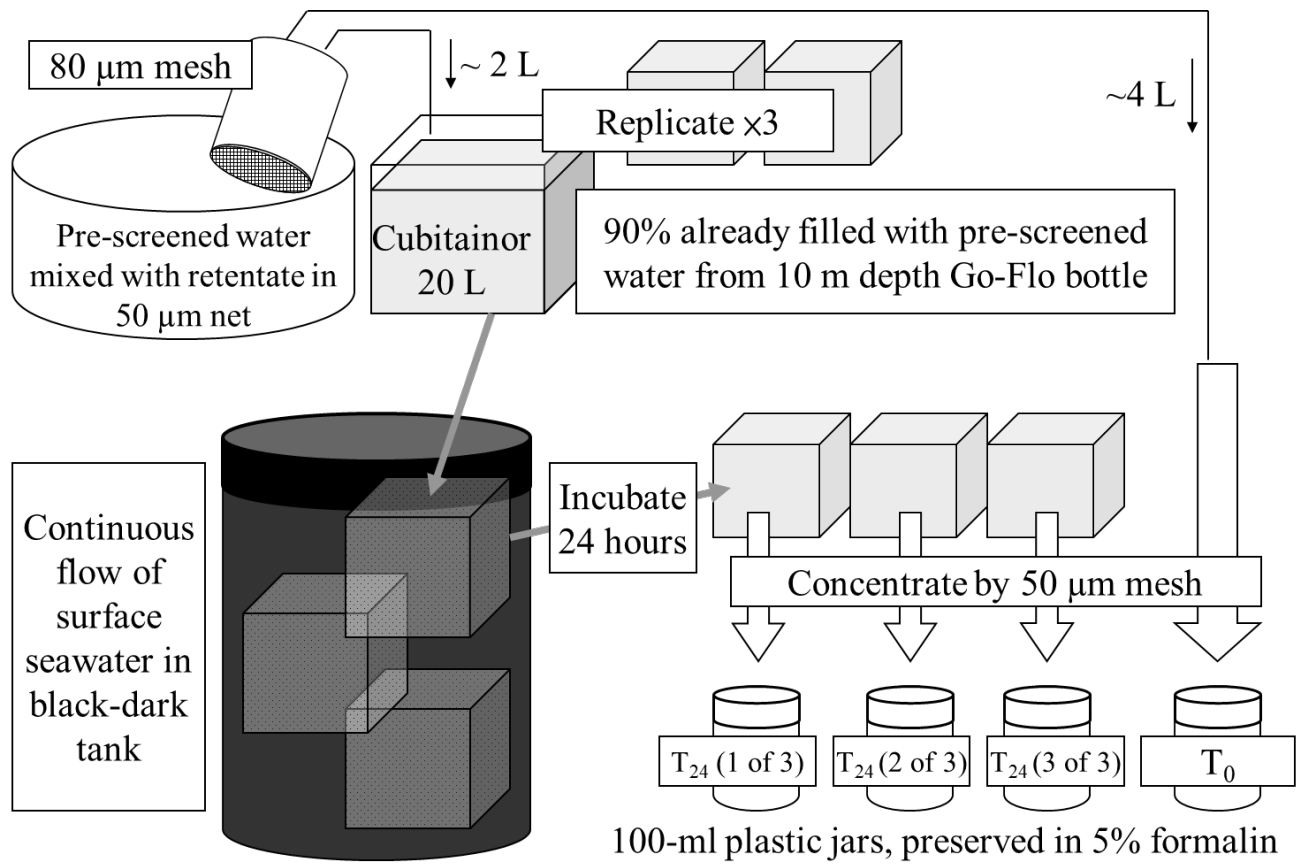

Fig. C1. Schematic diagram illustrating incubation experiments for the 50-80 µm size fraction.

Animals from the retentate were limited to the 50-80 µm size range by using a 50 µm plankton net and 80 µm mesh. Three replicates were carried out, incubated in the tank for 24 hours, and preserved in 5% formalin (T<sub>24</sub>). An additional sample, T<sub>0</sub> was also preserved at the beginning of incubation and served as the reference relative to each T<sub>24</sub> replicate.

## **Supplement D – Multiple-peak consideration in determining community carbon biomass before and after incubation for growth rate estimates.**

Traditionally, the average biomass at the start ( $W_0$ ) and end ( $W_T$ ) of incubations are used to calculate growth rate with the artificial cohort method (e.g. Kimmerer et al., 2007; Kobari et al., 2007; McKinnon and Duggan, 2003). However, this simple approach may not be appropriate when the method is used to measure community-level growth rates. Since copepod communities in our subtropical environment are complex and diverse (e.g. Lo et al., 2004; Tseng et al., 2008), the biomass spectra of the copepod assemblages always consisted of multiple peaks (occurrence: 95.5%) despite our efforts to create single cohorts (peak) by the artificial cohort technique. Under these circumstances, growth rates calculated with simple mean biomass values may be biased by the frequency difference between the assemblages before and after incubation. Specifically, if the assemblage before an incubation has two peaks and the larger peak is associated with high biomass (i.e. highly skewed) and the corresponding assemblage after incubation also has two peaks but the larger peak is now associated with low biomass (as shown in Fig. E1), the estimated growth rate will be inevitably under-estimated (vice versa).

To overcome this difficulty, we have developed a new procedure which accounts for multiple biomass peaks in artificial cohort experiments. For each copepod assemblage before ( $T = 0$ ) and after (three replicates of  $T = 24/48$ ) incubation, the representative biomass ( $W_0$  and  $W_T$ ) was determined by the following procedures. First, we calculated the probability density estimate (PDE) using the  $\ln(\text{carbon biomass})$  values of all copepod individuals by the kernel smoothing technique (see Fig. D1 for illustration) for each assemblage of each taxon. Only the assemblages with  $\geq 30$  individual copepods were used here (average number for each taxon:  $\sim 160$ , range from 30 to 1182). The estimation was based on a normal kernel function (Bowman and Azzalini, 1997), and the bandwidth of kernel-smoothing window was 0.1. Secondly, the local maximal values (peaks) of PDE were singled out. To avoid any bias caused by outliers, we excluded the minor peaks that have a probability density (peak height) lower than one-third height of the largest peak. Thirdly, unrealistic values (i.e. negative growth, which might arise from contamination or experimental failure) were removed. The criteria for removal were as follows: for any peak-biomass at  $T = 0$  that is higher than all the peak-biomass at  $T = 24/48$ , that peak at  $T = 0$  was eliminated. Similarly, for any peak-biomass at  $T = 24/48$  that is lower than all the peak-biomass at  $T = 0$ , that peak at  $T = 24/48$  was eliminated. Following this criteria, only one or two (rarely three) peaks ever remained for each assemblage. Unbalanced numbers of peaks between  $T = 0$  and  $T = 24/48$  were permitted in growth rate calculations because copepod growth patterns can vary as a consequence of the complex composition of a diverse copepod assemblage (as discussed above). The average value (or single value if only one peak was identified) of the remaining peak-biomass was then the representative biomass value for the assemblage. Note

that we have only one  $T = 0$  sample and three  $T = 24/48$  replicates. Thus, a total of three pairs of  $[W_0-W_T]$  for one incubation for each taxon were calculated. Each pair of  $[W_0-W_T]$  was used to calculate growth rate values as  $g = \ln\left(\frac{W_T}{W_0}\right)/T$ . Finally, the growth rate estimates represent the average of the three values from the replicates.

## References

- Bowman, A. W. and Azzalini, A.: Applied Smoothing Techniques for Data Analysis, Oxford University New York, 1997.
- Lo, W. T., Shih, C. T., and Hwang, J. S.: Copepod assemblages and diel vertical migration in the East China Sea, North of Taiwan, *Crustaceana*, 77, 955-971, 2004.
- Tseng, L. C., Souissi, S., Dahms, H. U., Chen, Q. C., and Hwang, J. S.: Copepod communities related to water masses in the southwest East China Sea, *Helgol. Mar. Res.*, 62, 153-165, 2008.

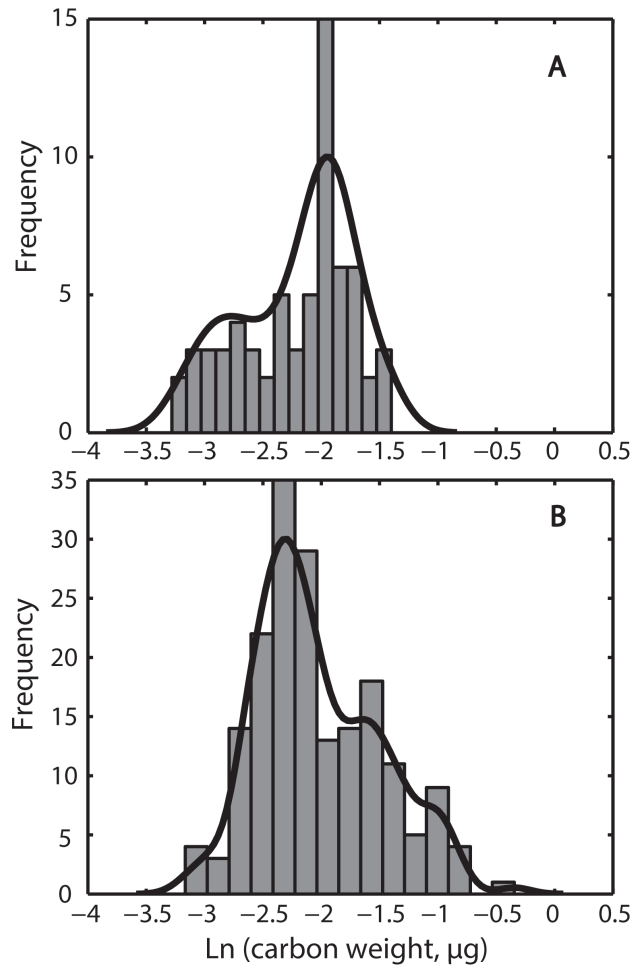

Fig. D1. Examples illustrating carbon biomass frequency (bar) and probability density estimate (bold line) of copepod assemblages at (A)  $T = 0$  and (B)  $T = 24$ . Note that the Y-axis of probability density was rescaled for illustration.

## Supplement E – Illustration of “food-limited” growth

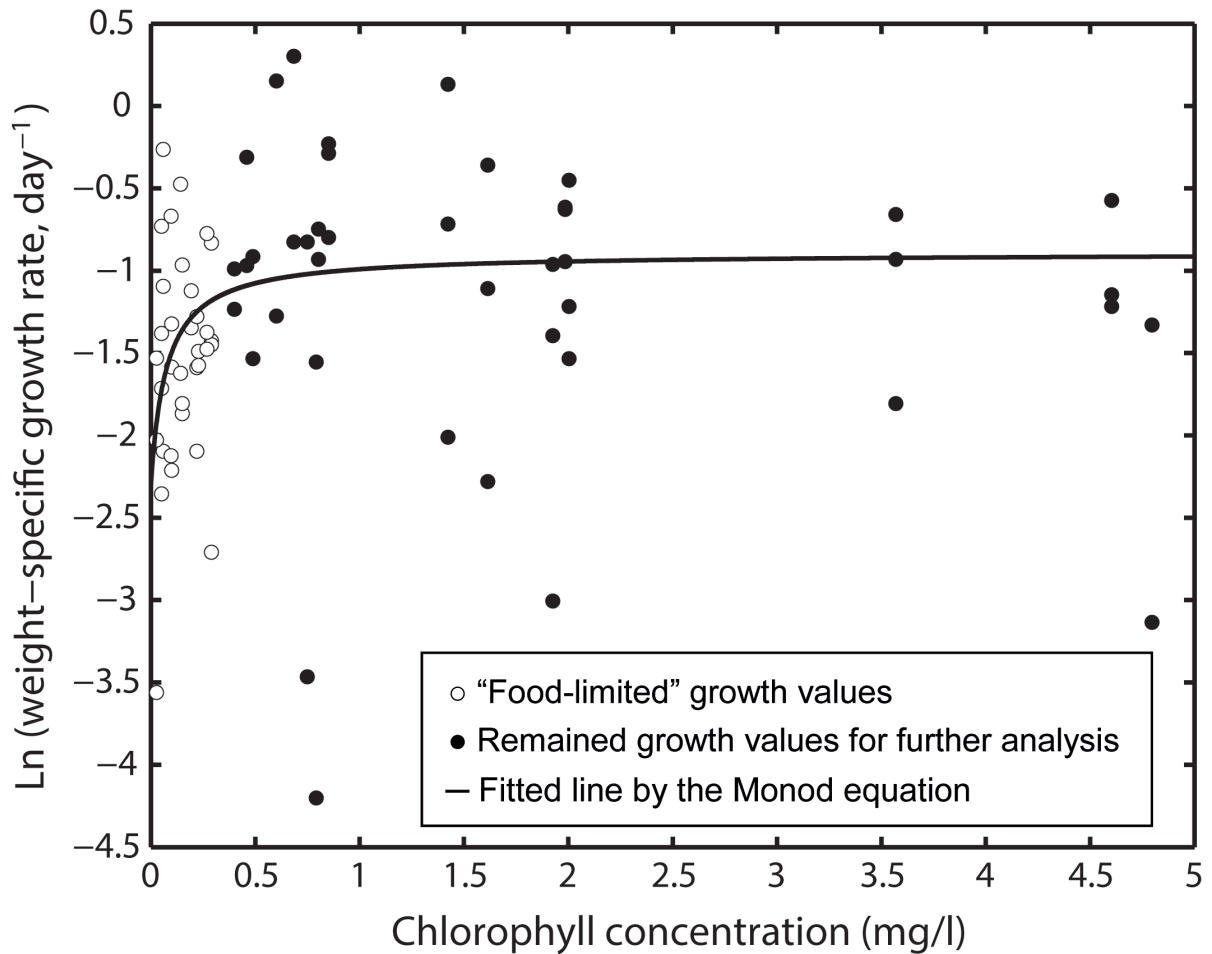

Fig. E1. Relationship between the  $\ln(\text{weight-specific growth rate})$  and chlorophyll  $a$  concentration for the broadcaster group. The definition of “food-limited” was evaluated as follows. We consider the log-transformed Monod equation:  $\ln(g) = \frac{g_{max}[Chl]}{K_m + [Chl]}$ , where  $g$  is the measured weight-specific growth rate;  $g_{max}$  is maximum rate;  $[Chl]$  is the chlorophyll  $a$  concentration;  $K_m$  is the chlorophyll  $a$  concentration at which  $g$  equals  $g_{max}/2$ . The growth rates measured at chlorophyll  $a$  concentration below  $4 \times K_m$  (0.30 mg) were defined as “food-limited” (open circles).



Supplement F – Comparison of growth rates in different *K*-means groups.

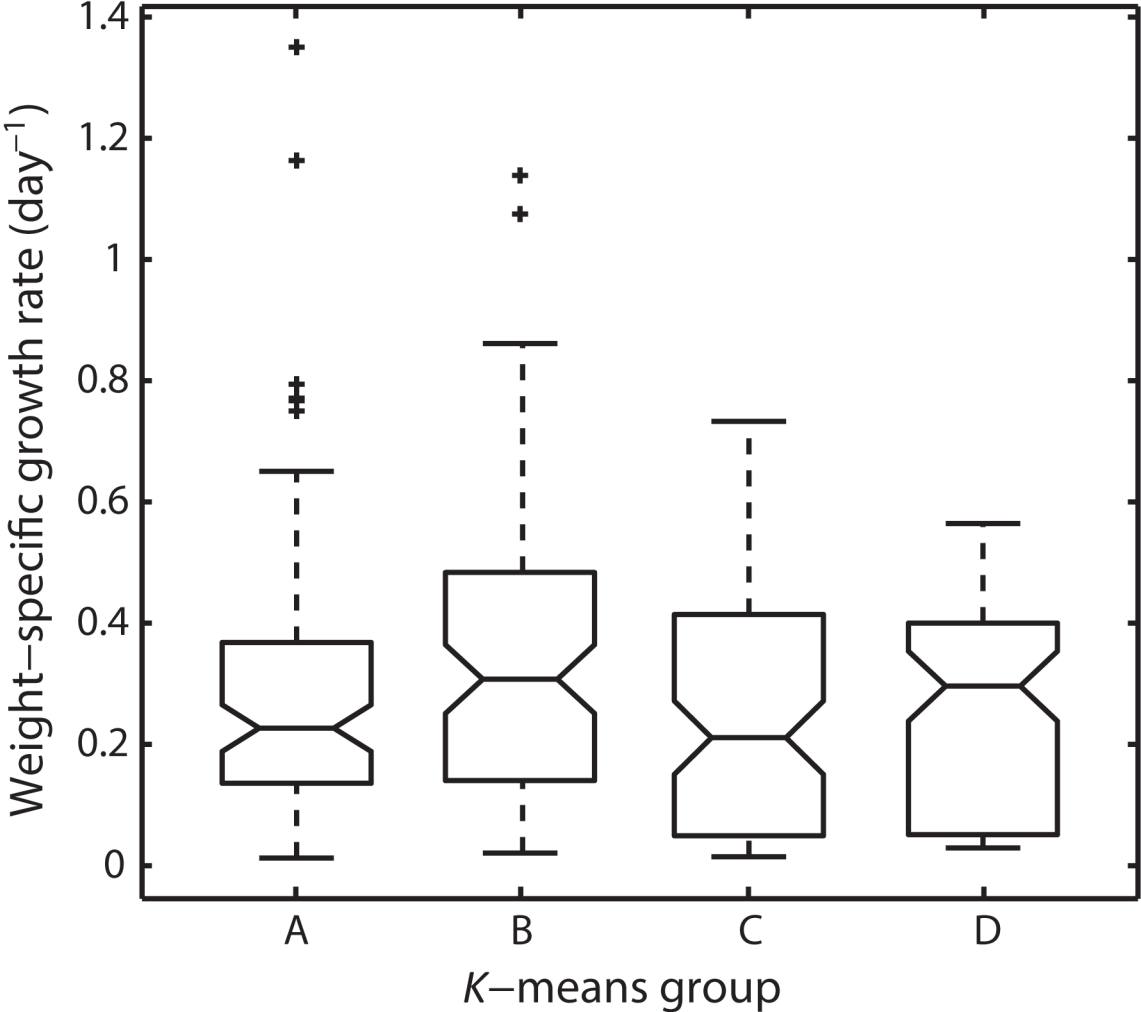

Fig. F1. Weight-specific growth rates in different *K*-means groups. The boxplots for each taxon indicate the values of medians, median intervals (notch ranges), 25<sup>th</sup> and 75<sup>th</sup> percentiles (box ranges), 95% confidence intervals (whiskers), and outliers (crosses).
